# Supplementary material for: Postprandial responses of circulating energy homeostasis mediators to single macronutrient challenges: influence of obesity and sex hormones
Source: Royal Society of Chemistry journal article supplement (doi:10.1039/d0fo02305a), 2021-01-01
Supplement: d0fo02305a1.pdf [file d0fo02305a1.pdf]

## ELECTRONIC SUPPLEMENTARY INFORMATION

### METHODS

#### *Leukocyte isolation*

Peripheral blood leukocytes were immediately obtained after blood draw from EDTA anticoagulated blood samples after incubation for 60 minutes with cold dextran 3% (1:1) at 4°C. Cells in the supernatant were diluted in NaCl 0.9% up to 50 ml and centrifuged at 525 x g for 10 min at 4°C. Cells were then lysed by osmotic shock during 50 seconds and subsequently washed twice at 325xg and 250xg in NaCl 0.9% at 4°C. Cell pellets were resuspended in cold PBS, counted in a Neubauer chamber and finally centrifuged at 250xg for 10 min to be stored in RNAlater (Sigma-Aldrich Química S.A., Alcobendas, Spain) at -80°C.

#### *Quality control and relative quantification (qPCR)*

RNA yield, quality and purity were assessed with a NanoDrop2000 spectrophotometer and the Qubit RNA HS Assay kit in a Qubit3.0 fluorimeter (ThermoFisher Scientific – Spain). We randomly selected more than 30 samples to evaluate the RNA integrity number (RIN) with the High Sensitivity RNA ScreenTape in a TapeStation2200 (Agilent Technologies). All the samples evaluated presented RINs > 8.5.

To test our samples for factors that could lead to unreliable results in SYBR Green qPCR we evaluated 24 unselected samples with the Human RT2 RNA QC PCR array (Qiagen, Hilden, Germany) prior to proceeding with complete gene expression experiments. We also evaluated seven genes (*B2M*, *GUSB*, *ACTB*, *HPRT1*, *TBP*, *RPS18* and *GADPH*) to determine their usability as reference genes. *RPS18* and *HPRT1* showed a more consistent expression in our samples and therefore were selected as reference genes for data normalization (Primer sets, buffer and enzyme are available from AnyGenes, Paris, France). For the relative quantification of gene expression levels we used the comparative threshold cycle method.<sup>1</sup> A quantification cycle (Cq) was obtained for each amplification curve and a  $\Delta Cq$  value was first calculated by subtracting the average Cq value of *RPS18* and *HPRT1* from the Cq value of the gene of interest. Data were expressed as arbitrary units using the following transformation [expression =  $\log_2^{-\Delta Cq}$ ].

1. K. J. Livak and T. D. Schmittgen, Analysis of relative gene expression data using real-time quantitative PCR and the 2(-Delta Delta C(T)) Method, *Methods*, 2001, **25**, 402-408.

**Table S1.** Correlations between the responses during the oral loads (AUCs) and their corresponding fasting levels.

| Fasting            | AUC                                    | All subjects<br>(n = 53)   | Subjects without obesity<br>(n = 28) | Subjects with obesity<br>(n = 25) |
|--------------------|----------------------------------------|----------------------------|--------------------------------------|-----------------------------------|
| Serum Ghrelin      | Ghrelin during glucose load            | $\rho = -0.843, P < 0.001$ | $\rho = -0.854, P < 0.001$           | $\rho = -0.740, P < 0.001$        |
|                    | Ghrelin during lipid load              | $\rho = -0.716, P < 0.001$ | $\rho = -0.852, P < 0.001$           | $\rho = -0.425, P = 0.043$        |
|                    | Ghrelin during protein load            | $\rho = -0.661, P < 0.001$ | $\rho = -0.739, P < 0.001$           | $\rho = -0.310, P = 0.161$        |
| GHRL expression    | GHRL expression during glucose load    | $r = -0.327, P = 0.017$    | $r = -0.403, P = 0.030$              | $r = -0.214, P = 0.305$           |
|                    | GHRL expression during lipid load      | $r = -0.495, P < 0.001$    | $r = -0.501, P = 0.007$              | $r = -0.464, P = 0.020$           |
|                    | GHRL expression during protein load    | $r = -0.135, P = 0.336$    | $r = -0.195, P = 0.320$              | $r = -0.085, P = 0.686$           |
| Serum Leptin       | Leptin during glucose load             | $\rho = -0.306, P = 0.026$ | $\rho = -0.563, P = 0.002$           | $\rho = -0.144, P = 0.493$        |
|                    | Leptin during lipid load               | $\rho = -0.319, P = 0.020$ | $\rho = -0.577, P = 0.001$           | $\rho = -0.234, P = 0.261$        |
|                    | Leptin during protein load             | $\rho = -0.737, P < 0.001$ | $\rho = -0.857, P < 0.001$           | $\rho = -0.628, P = 0.001$        |
| LEPR expression    | LEPR expression during glucose load    | $r = -0.575, P < 0.001$    | $r = -0.691, P < 0.001$              | $r = -0.352, P = 0.085$           |
|                    | LEPR expression during lipid load      | $r = -0.499, P < 0.001$    | $r = -0.526, P = 0.004$              | $r = -0.421, P = 0.036$           |
|                    | LEPR expression during protein load    | $r = -0.409, P = 0.002$    | $r = -0.461, P = 0.014$              | $r = -0.487, P = 0.014$           |
| Serum sLepR        | sLepR during glucose load              | $\rho = -0.287, P = 0.037$ | $\rho = -0.065, P = 0.741$           | $\rho = -0.575, P = 0.003$        |
|                    | sLepR during lipid load                | $\rho = -0.209, P = 0.133$ | $\rho = -0.305, P = 0.114$           | $\rho = -0.041, P = 0.844$        |
|                    | sLepR during protein load              | $\rho = -0.377, P = 0.005$ | $\rho = -0.485, P = 0.009$           | $\rho = -0.199, P = 0.341$        |
| Serum Adiponectin  | Adiponectin during glucose load        | $\rho = -0.055, P = 0.696$ | $\rho = -0.187, P = 0.342$           | $\rho = 0.298, P = 0.148$         |
|                    | Adiponectin during lipid load          | $\rho = -0.440, P = 0.001$ | $\rho = -0.252, P = 0.206$           | $\rho = -0.685, P < 0.001$        |
|                    | Adiponectin during protein load        | $\rho = -0.542, P < 0.001$ | $\rho = -0.691, P < 0.001$           | $\rho = -0.280, P = 0.175$        |
| ADIPOR1 expression | ADIPOR1 expression during glucose load | $r = -0.272, P = 0.049$    | $r = -0.184, P = 0.349$              | $r = -0.403, P = 0.046$           |
|                    | ADIPOR1 expression during lipid load   | $r = -0.567, P < 0.001$    | $r = -0.525, P = 0.004$              | $r = -0.609, P = 0.001$           |
|                    | ADIPOR1 expression during protein load | $r = -0.101, P = 0.473$    | $r = -0.190, P = 0.333$              | $r = -0.056, P = 0.791$           |

Data were submitted to Pearson's (r) or Spearman's ( $\rho$ ) correlation analysis as needed.

**Table S2.** Fasting levels and during the distinct macronutrient challenges of circulating ghrelin and *GHRL* expression.

|                                  |                    | Control women         |                    | Women with PCOS       |                    | Control men            |                    | <i>P</i> value | <i>P</i> value       | <i>P</i> value         |
|----------------------------------|--------------------|-----------------------|--------------------|-----------------------|--------------------|------------------------|--------------------|----------------|----------------------|------------------------|
|                                  |                    | No obesity<br>(n = 9) | Obesity<br>(n = 8) | No obesity<br>(n = 9) | Obesity<br>(n = 8) | No obesity<br>(n = 10) | Obesity<br>(n = 9) | Oral load      | Oral load<br>x Group | Oral load<br>x Obesity |
| <i>Serum levels</i>              |                    |                       |                    |                       |                    |                        |                    |                |                      |                        |
| <b>Ghrelin</b><br>(pg/ml)        | Glucose Load (0 h) | 27.5 ± 21.7           | 11.5 ± 3.1         | 24.4 ± 9.8            | 17.6 ± 8.7         | 21.1 ± 15.0            | 15.2 ± 9.1         |                |                      |                        |
|                                  | Glucose Load (1 h) | 19.5 ± 13.7           | 10.2 ± 2.3         | 14.3 ± 8.4            | 10.9 ± 5.0         | 15.0 ± 10.8            | 10.7 ± 2.9         | <0.001         | 0.125                | 0.034                  |
|                                  | Glucose Load (2 h) | 15.8 ± 8.0            | 13.5 ± 7.1         | 14.2 ± 7.0            | 16.8 ± 9.8         | 21.4 ± 16.5            | 14.2 ± 5.5         |                |                      |                        |
|                                  | Lipid Load (0 h)   | 33.7 ± 19.0           | 19.5 ± 17.8        | 26.1 ± 15.0           | 17.7 ± 7.3         | 24.9 ± 29.9            | 14.3 ± 5.5         |                |                      |                        |
|                                  | Lipid Load (2 h)   | 22.7 ± 11.3           | 15.5 ± 10.2        | 17.7 ± 8.4            | 15.3 ± 9.9         | 21.8 ± 17.7            | 13.9 ± 4.8         | 0.001          | 0.022                | 0.364                  |
|                                  | Lipid Load (4 h)   | 16.2 ± 7.4            | 13.1 ± 4.2         | 23.1 ± 18.5           | 12.9 ± 2.5         | 22.1 ± 19.2            | 15.6 ± 5.2         |                |                      |                        |
|                                  | Protein Load (0 h) | 36.4 ± 35.5           | 16.9 ± 7.1         | 42.5 ± 23.5           | 22.8 ± 14.6        | 38.1 ± 20.1            | 20.6 ± 9.8         |                |                      |                        |
|                                  | Protein Load (1 h) | 39.5 ± 31.0           | 17.6 ± 11.8        | 25.7 ± 10.6           | 30.3 ± 17.4        | 23.0 ± 8.1             | 20.7 ± 10.4        | 0.495          | 0.098                | 0.091                  |
|                                  | Protein Load (2 h) | 40.7 ± 37.2           | 17.7 ± 7.9         | 28.4 ± 26.9           | 19.3 ± 7.3         | 46.6 ± 40.6            | 19.8 ± 7.4         |                |                      |                        |
| <i>Leukocyte gene expression</i> |                    |                       |                    |                       |                    |                        |                    |                |                      |                        |
| <b>GHRL</b><br>(a.u.)            | Glucose Load (0 h) | -1.59 ± 0.14          | -1.62 ± 0.11       | -1.58 ± 0.16          | -1.61 ± 0.13       | -1.66 ± 0.16           | -1.53 ± 0.17       |                |                      |                        |
|                                  | Glucose Load (1 h) | -1.50 ± 0.15          | -1.55 ± 0.12       | -1.62 ± 0.14          | -1.57 ± 0.17       | -1.60 ± 0.22           | -1.42 ± 0.19       | 0.006          | 0.130                | 0.265                  |
|                                  | Glucose Load (2 h) | -1.46 ± 0.15          | -1.60 ± 0.10       | -1.62 ± 0.10          | -1.61 ± 0.16       | -1.57 ± 0.20           | -1.45 ± 0.14       |                |                      |                        |
|                                  | Lipid Load (0 h)   | -1.61 ± 0.20          | -1.63 ± 0.18       | -1.65 ± 0.17          | -1.63 ± 0.10       | -1.67 ± 0.18           | -1.54 ± 0.13       |                |                      |                        |
|                                  | Lipid Load (2 h)   | -1.61 ± 0.24          | -1.66 ± 0.17       | -1.59 ± 0.14          | -1.65 ± 0.14       | -1.64 ± 0.14           | -1.53 ± 0.11       | 0.259          | 0.750                | 0.486                  |
|                                  | Lipid Load (4 h)   | -1.60 ± 0.20          | -1.68 ± 0.12       | -1.71 ± 0.13          | -1.64 ± 0.10       | -1.66 ± 0.18           | -1.56 ± 0.15       |                |                      |                        |
|                                  | Protein Load (0 h) | -1.59 ± 0.15          | -1.58 ± 0.15       | -1.63 ± 0.10          | -1.57 ± 0.07       | -1.65 ± 0.15           | -1.50 ± 0.08       |                |                      |                        |
|                                  | Protein Load (1 h) | -1.64 ± 0.17          | -1.61 ± 0.18       | -1.62 ± 0.14          | -1.57 ± 0.19       | -1.65 ± 0.17           | -1.47 ± 0.17       | 0.859          | 0.565                | 0.647                  |
|                                  | Protein Load (2 h) | -1.64 ± 0.21          | -1.62 ± 0.09       | -1.60 ± 0.11          | -1.56 ± 0.15       | -1.63 ± 0.18           | -1.52 ± 0.15       |                |                      |                        |

Data are means ± SD. Data were analyzed by univariate general linear models for repeated measures introducing fasting and postprandial levels as within-subjects factor (to evaluate differences from fasting levels: *Oral load P* value), and Obesity and Group as between-subjects factor (to evaluate their influence in the postprandial response: *Oral load x Group* and *Oral load x Obesity P* values). PCOS, polycystic ovary syndrome.

**Table S3.** Fasting levels and during the distinct macronutrient challenges of circulating leptin, sLepR and *LEPR* expression.

|                                  |                    | Control women         |                    | Women with PCOS       |                    | Control men            |                    | <i>P</i> value | <i>P</i> value       | <i>P</i> value         |
|----------------------------------|--------------------|-----------------------|--------------------|-----------------------|--------------------|------------------------|--------------------|----------------|----------------------|------------------------|
|                                  |                    | No obesity<br>(n = 9) | Obesity<br>(n = 8) | No obesity<br>(n = 9) | Obesity<br>(n = 8) | No obesity<br>(n = 10) | Obesity<br>(n = 9) | Oral load      | Oral load<br>x Group | Oral load<br>x Obesity |
| <i>Serum levels</i>              |                    |                       |                    |                       |                    |                        |                    |                |                      |                        |
| Leptin<br>(ng/ml)                | Glucose Load (0 h) | 43 ± 33               | 131 ± 118          | 38 ± 36               | 125 ± 93           | 7 ± 4                  | 25 ± 16            |                |                      |                        |
|                                  | Glucose Load (1 h) | 40 ± 26               | 140 ± 132          | 35 ± 31               | 118 ± 83           | 6 ± 4                  | 24 ± 15            | 0.069          | 0.360                | 0.508                  |
|                                  | Glucose Load (2 h) | 42 ± 34               | 144 ± 152          | 35 ± 32               | 119 ± 94           | 6 ± 4                  | 26 ± 17            |                |                      |                        |
|                                  | Lipid Load (0 h)   | 61 ± 51               | 158 ± 110          | 52 ± 33               | 145 ± 69           | 9 ± 4                  | 35 ± 22            |                |                      |                        |
|                                  | Lipid Load (2 h)   | 61 ± 52               | 154 ± 109          | 46 ± 29               | 147 ± 68           | 8 ± 4                  | 31 ± 21            | <0.001         | 0.024                | 0.181                  |
|                                  | Lipid Load (4 h)   | 55 ± 47               | 143 ± 95           | 45 ± 29               | 147 ± 71           | 7 ± 4                  | 30 ± 22            |                |                      |                        |
|                                  | Protein Load (0 h) | 62 ± 32               | 147 ± 97           | 54 ± 38               | 128 ± 56           | 7 ± 3                  | 42 ± 32            |                |                      |                        |
|                                  | Protein Load (1 h) | 57 ± 29               | 122 ± 80           | 49 ± 35               | 122 ± 58           | 7 ± 3                  | 33 ± 20            | <0.001         | 0.750                | 0.675                  |
|                                  | Protein Load (2 h) | 52 ± 27               | 122 ± 85           | 47 ± 35               | 116 ± 58           | 6 ± 3                  | 31 ± 20            |                |                      |                        |
| sLepR<br>(ng/ml)                 | Glucose Load (0 h) | 21.0 ± 5.7            | 16.4 ± 2.1         | 18.6 ± 4.4            | 16.3 ± 2.6         | 19.8 ± 5.2             | 14.1 ± 2.0         |                |                      |                        |
|                                  | Glucose Load (1 h) | 20.6 ± 6.9            | 15.3 ± 2.2         | 17.6 ± 4.0            | 14.3 ± 2.1         | 18.8 ± 5.9             | 13.8 ± 2.1         | 0.001          | 0.661                | 0.773                  |
|                                  | Glucose Load (2 h) | 20.4 ± 7.1            | 15.0 ± 2.1         | 18.1 ± 3.3            | 14.7 ± 2.1         | 18.5 ± 4.9             | 14.1 ± 2.1         |                |                      |                        |
|                                  | Lipid Load (0 h)   | 19.9 ± 4.1            | 14.2 ± 6.3         | 16.6 ± 8.3            | 13.6 ± 6.2         | 17.0 ± 6.2             | 13.4 ± 4.8         |                |                      |                        |
|                                  | Lipid Load (2 h)   | 17.5 ± 4.5            | 14.4 ± 6.8         | 17.3 ± 9.0            | 13.3 ± 6.2         | 15.3 ± 5.5             | 13.1 ± 6.2         | 0.042          | 0.410                | 0.178                  |
|                                  | Lipid Load (4 h)   | 17.9 ± 4.7            | 14.2 ± 6.8         | 16.8 ± 6.8            | 12.7 ± 5.0         | 13.2 ± 6.2             | 13.4 ± 5.7         |                |                      |                        |
|                                  | Protein Load (0 h) | 22.9 ± 4.8            | 15.0 ± 3.3         | 17.4 ± 5.3            | 15.7 ± 5.7         | 18.2 ± 6.2             | 14.7 ± 5.6         |                |                      |                        |
|                                  | Protein Load (1 h) | 20.0 ± 4.7            | 14.3 ± 4.5         | 14.5 ± 3.7            | 14.0 ± 5.6         | 17.2 ± 5.8             | 14.7 ± 6.3         | 0.001          | 0.128                | 0.139                  |
|                                  | Protein Load (2 h) | 20.1 ± 4.9            | 14.6 ± 4.8         | 16.8 ± 5.1            | 15.6 ± 5.9         | 17.6 ± 6.5             | 14.6 ± 5.7         |                |                      |                        |
| <i>Leukocyte gene expression</i> |                    |                       |                    |                       |                    |                        |                    |                |                      |                        |
| <i>LEPR</i><br>(a.u.)            | Glucose Load (0 h) | -1.91 ± 0.18          | -1.96 ± 0.15       | -1.91 ± 0.19          | -1.90 ± 0.14       | -1.95 ± 0.15           | -1.87 ± 0.11       |                |                      |                        |
|                                  | Glucose Load (1 h) | -1.87 ± 0.16          | -1.91 ± 0.15       | -1.89 ± 0.08          | -1.90 ± 0.15       | -1.89 ± 0.15           | -1.77 ± 0.14       | 0.004          | 0.670                | 0.951                  |
|                                  | Glucose Load (2 h) | -1.85 ± 0.14          | -1.91 ± 0.14       | -1.90 ± 0.16          | -1.84 ± 0.07       | -1.86 ± 0.16           | -1.80 ± 0.08       |                |                      |                        |
|                                  | Lipid Load (0 h)   | -1.89 ± 0.13          | -1.90 ± 0.11       | -1.85 ± 0.12          | -1.76 ± 0.13       | -1.91 ± 0.18           | -1.79 ± 0.11       |                |                      |                        |
|                                  | Lipid Load (2 h)   | -1.90 ± 0.11          | -1.87 ± 0.13       | -1.82 ± 0.11          | -1.82 ± 0.14       | -1.88 ± 0.17           | -1.84 ± 0.13       | 0.655          | 0.265                | 0.238                  |
|                                  | Lipid Load (4 h)   | -1.91 ± 0.12          | -1.92 ± 0.13       | -1.85 ± 0.14          | -1.73 ± 0.14       | -1.85 ± 0.12           | -1.79 ± 0.10       |                |                      |                        |
|                                  | Protein Load (0 h) | -1.91 ± 0.14          | -1.87 ± 0.09       | -1.87 ± 0.13          | -1.82 ± 0.12       | -1.85 ± 0.15           | -1.85 ± 0.06       |                |                      |                        |
|                                  | Protein Load (1 h) | -1.92 ± 0.16          | -1.91 ± 0.12       | -1.91 ± 0.12          | -1.83 ± 0.11       | -1.87 ± 0.12           | -1.82 ± 0.10       | 0.662          | 0.817                | 0.089                  |
|                                  | Protein Load (2 h) | -1.92 ± 0.10          | -1.90 ± 0.14       | -1.93 ± 0.14          | -1.76 ± 0.08       | -1.88 ± 0.15           | -1.80 ± 0.10       |                |                      |                        |

Data are means ± SD. Gene expression values are showed as arbitrary units (a.u.) using the equation  $\log_2^{-\Delta\Delta Cq}$ . Data were analyzed by univariate general linear models for repeated measures introducing fasting and postprandial values as within-subjects factor (to evaluate differences from fasting levels: *Oral load P* value), and Obesity and Group as between-subjects factor (to evaluate their influence in the postprandial response: *Oral load x Group* and *Oral load x Obesity P* values). PCOS, polycystic ovary syndrome.

**Table S4.** Fasting levels and during the distinct macronutrient challenges of circulating adiponectin and *ADIPOR1* expression.

|                                  |                    | Control women         |                    | Women with PCOS       |                    | Control men            |                    | <i>P</i> value | <i>P</i> value       | <i>P</i> value         |
|----------------------------------|--------------------|-----------------------|--------------------|-----------------------|--------------------|------------------------|--------------------|----------------|----------------------|------------------------|
|                                  |                    | No obesity<br>(n = 9) | Obesity<br>(n = 8) | No obesity<br>(n = 9) | Obesity<br>(n = 8) | No obesity<br>(n = 10) | Obesity<br>(n = 9) | Oral load      | Oral load<br>x Group | Oral load<br>x Obesity |
| <i>Serum levels</i>              |                    |                       |                    |                       |                    |                        |                    |                |                      |                        |
| Adiponectin<br>(µg/ml)           | Glucose Load (0 h) | 59.6 ± 95.9           | 16.8 ± 12.4        | 58.8 ± 44.0           | 34.9 ± 33.5        | 13.3 ± 9.1             | 13.8 ± 9.1         |                |                      |                        |
|                                  | Glucose Load (1 h) | 54.9 ± 70.7           | 20.6 ± 23.8        | 54.7 ± 44.1           | 32.6 ± 27.6        | 10.4 ± 6.5             | 13.1 ± 9.1         | 0.582          | 0.060                | 0.286                  |
|                                  | Glucose Load (2 h) | 51.0 ± 64.3           | 17.3 ± 11.7        | 59.3 ± 53.1           | 47.2 ± 53.7        | 10.8 ± 7.1             | 14.8 ± 13.6        |                |                      |                        |
|                                  | Lipid Load (0 h)   | 28.1 ± 27.4           | 24.1 ± 30.4        | 48.1 ± 32.5           | 22.7 ± 19.0        | 11.0 ± 6.9             | 16.2 ± 13.9        |                |                      |                        |
|                                  | Lipid Load (2 h)   | 33.0 ± 33.1           | 21.4 ± 19.7        | 35.8 ± 15.8           | 21.6 ± 19.3        | 12.6 ± 7.6             | 15.4 ± 11.7        | 0.994          | 0.175                | 0.983                  |
|                                  | Lipid Load (4 h)   | 29.5 ± 18.5           | 22.0 ± 21.7        | 42.7 ± 32.5           | 18.9 ± 12.4        | 11.3 ± 6.2             | 14.1 ± 11.2        |                |                      |                        |
|                                  | Protein Load (0 h) | 59.9 ± 66.7           | 19.6 ± 17.5        | 66.9 ± 84.2           | 26.2 ± 24.0        | 12.8 ± 6.6             | 15.3 ± 10.7        |                |                      |                        |
|                                  | Protein Load (1 h) | 39.0 ± 31.4           | 18.4 ± 13.8        | 50.4 ± 47.4           | 26.1 ± 30.9        | 10.3 ± 5.6             | 15.0 ± 10.9        | 0.050          | 0.930                | 0.128                  |
| Protein Load (2 h)               | 53.5 ± 64.4        | 18.0 ± 14.4           | 40.1 ± 20.4        | 27.2 ± 26.5           | 11.3 ± 6.4         | 17.3 ± 13.3            |                    |                |                      |                        |
| <i>Leukocyte gene expression</i> |                    |                       |                    |                       |                    |                        |                    |                |                      |                        |
| ADIPOR1<br>(a.u.)                | Glucose Load (0 h) | -0.18 ± 0.10          | -0.21 ± 0.11       | -0.22 ± 0.10          | -0.18 ± 0.11       | -0.25 ± 0.13           | -0.12 ± 0.20       |                |                      |                        |
|                                  | Glucose Load (1 h) | -0.08 ± 0.17          | -0.10 ± 0.13       | -0.16 ± 0.14          | -0.12 ± 0.12       | -0.18 ± 0.15           | 0.00 ± 0.19        | <0.001         | 0.623                | 0.764                  |
|                                  | Glucose Load (2 h) | -0.08 ± 0.18          | -0.14 ± 0.07       | -0.19 ± 0.13          | -0.14 ± 0.14       | -0.17 ± 0.15           | -0.04 ± 0.17       |                |                      |                        |
|                                  | Lipid Load (0 h)   | -0.17 ± 0.13          | -0.31 ± 0.10       | -0.27 ± 0.13          | -0.18 ± 0.10       | -0.29 ± 0.11           | -0.16 ± 0.14       |                |                      |                        |
|                                  | Lipid Load (2 h)   | -0.13 ± 0.14          | -0.25 ± 0.04       | -0.20 ± 0.15          | -0.19 ± 0.13       | -0.19 ± 0.10           | -0.11 ± 0.10       | 0.004          | 0.765                | 0.507                  |
|                                  | Lipid Load (4 h)   | -0.12 ± 0.10          | -0.27 ± 0.08       | -0.23 ± 0.13          | -0.14 ± 0.10       | -0.21 ± 0.14           | -0.12 ± 0.14       |                |                      |                        |
|                                  | Protein Load (0 h) | -0.19 ± 0.11          | -0.19 ± 0.07       | -0.21 ± 0.09          | -0.12 ± 0.08       | -0.24 ± 0.11           | -0.15 ± 0.10       |                |                      |                        |
|                                  | Protein Load (1 h) | -0.19 ± 0.10          | -0.19 ± 0.12       | -0.20 ± 0.10          | -0.17 ± 0.09       | -0.25 ± 0.15           | -0.07 ± 0.16       | 0.035          | 0.399                | 0.839                  |
| Protein Load (2 h)               | -0.16 ± 0.12       | -0.16 ± 0.11          | -0.18 ± 0.11       | -0.09 ± 0.08          | -0.23 ± 0.15       | -0.10 ± 0.14           |                    |                |                      |                        |

Data are means ± SD. Gene expression values are showed as arbitrary units (a.u.) using the equation  $\log_2^{-\Delta\Delta Cq}$ . Data were analyzed by univariate general linear models for repeated measures introducing fasting and postprandial levels as within-subjects factor (to evaluate differences from fasting levels: *Oral load P* value), and Obesity and Group as between-subjects factor (to evaluate their influence in the postprandial response: *Oral load x Group* and *Oral load x Obesity P* values). PCOS, polycystic ovary syndrome.

**Table S5.** Correlations between ISI and HOMA-IR and the areas under the curve (AUC) of serum ghrelin, leptin, sLepR and adiponectin during the different macronutrient oral challenges.

| <i>Oral Challenge</i> | <b>Ghrelin AUC</b>       |              | <b>Leptin AUC</b>        |              | <b>sLepR AUC</b>         |              | <b>Adiponectin AUC</b>   |              |
|-----------------------|--------------------------|--------------|--------------------------|--------------|--------------------------|--------------|--------------------------|--------------|
|                       | <i><math>\rho</math></i> | <i>p</i>     | <i><math>\rho</math></i> | <i>p</i>     | <i><math>\rho</math></i> | <i>p</i>     | <i><math>\rho</math></i> | <i>p</i>     |
| <i>Glucose load</i>   |                          |              |                          |              |                          |              |                          |              |
| ISI                   | -0.215                   | 0.126        | 0.011                    | 0.937        | 0.001                    | 0.995        | 0.103                    | 0.463        |
| HOMA-IR               | <b>0.263</b>             | <b>0.060</b> | -0.090                   | 0.521        | 0.109                    | 0.439        | -0.010                   | 0.941        |
| <i>Lipid load</i>     |                          |              |                          |              |                          |              |                          |              |
| ISI                   | -0.161                   | 0.260        | -0.060                   | 0.672        | -0.094                   | 0.504        | -0.229                   | 0.102        |
| HOMA-IR               | <b>0.234</b>             | <b>0.098</b> | 0.055                    | 0.698        | 0.083                    | 0.556        | 0.027                    | 0.847        |
| <i>Protein load</i>   |                          |              |                          |              |                          |              |                          |              |
| ISI                   | <b>-0.251</b>            | <b>0.082</b> | <b>0.315</b>             | <b>0.023</b> | <b>-0.270</b>            | <b>0.051</b> | <b>-0.298</b>            | <b>0.030</b> |
| HOMA-IR               | <b>0.385</b>             | <b>0.006</b> | -0.214                   | 0.128        | <b>0.345</b>             | <b>0.011</b> | <b>0.347</b>             | <b>0.011</b> |

Data were submitted to Spearman's correlation analysis. Correlations with  $p < 0.10$  are highlighted in boldface. HOMA-IR, homeostasis model assessment of insulin resistance; ISI, insulin sensitivity index.
